# Supplementary material for: Defective Pt nanoparticles encapsulated in mesoporous metal–organic frameworks for enhanced catalysis
Source: Royal Society of Chemistry journal article supplement (doi:10.1039/c8cc04485f), 2018-01-01
Supplement: c8cc04485f1.pdf [file c8cc04485f1.pdf]

# Defective Pt nanoparticles encapsulated in mesoporous metal-organic framework for enhanced catalysis

Qiang Wang,<sup>ab</sup> Xu-Sheng Wang,<sup>a</sup> Chun-Hui Chen,<sup>a</sup> Xue Yang,<sup>a</sup> Yuan-Biao Huang<sup>\*a</sup>  
and Rong Cao<sup>\*ac</sup>

<sup>a</sup> State Key Laboratory of Structural Chemistry, Fujian Institute of Research on the Structure of Matter, Chinese Academy of Sciences, 155, Yangqiao Road West, Fuzhou, Fujian, 350002, China

<sup>b</sup> College of Chemistry and Materials Science, Fujian Normal University, Fuzhou, Fujian 350007, P.R. China

<sup>c</sup> University of the Chinese Academy of Sciences, Beijing 100049, China

E-mail : rcao@fjirsm.ac.cn, ybhuang@fjirsm.ac.cn; Tel: 0591-63173153

## 1. Materials and Instrumentation.

The reagents chromium(III) nitrate nonahydrate ( $\text{Cr}(\text{NO}_3)_3 \cdot 9\text{H}_2\text{O}$ ), 1,4-benzene dicarboxylic acid, aqueous HF,  $\text{H}_2\text{PtCl}_6 \cdot 6\text{H}_2\text{O}$ ,  $\text{CoCl}_2 \cdot \text{anhydrous}$  *n*-hexane, nitrobenzene, 4-chloronitrobenzene, 4-nitrotoluene, 4-Nitrobenzaldehyde, 2-nitrophenol, 3-nitrophenol, 4-nitrophenol, acetone, ethanol, and N,N-dimethylformamide (DMF) were purchased from Tansoole, deionized water with the specific resistance of  $18.25 \text{ M}\Omega \cdot \text{cm}$ . Other reagents and solvents were obtained from commercial sources and used without further purification. Powder X-ray diffraction (PXRD) patterns were performed on a Miniflex 600 diffractometer using Cu-K $\alpha$  radiation ( $\lambda = 0.154 \text{ nm}$ , 30 kV, 15 mA). Nitrogen sorption isotherms were measured by a Micromeritics ASAP 2020 system at desired temperature, prior to nitrogen adsorption/desorption measurement, the samples were dried for 12 h at 393 K under vacuum. The size and morphologies of catalysts were studied using a FEIT 20 transmission electron microscope (TEM) and HRTEM working at 200 kV. Valence state of element was measured by X-ray photoelectron spectroscopy (XPS) on an ESCALAB 250Xi X-ray photoelectron spectrometer (Thermo Fisher) using an Al K $\alpha$  source (15 kV, 10 mA) with Ar etching for 30 min. The contents of Pt and Co in catalyst were quantified by inductively coupled plasma atomic emission spectroscopy

(ICP-AES) on an Ultima 2 analyzer (Jobin Yvon). The catalytic reaction products were analyzed and identified by gas chromatography-mass spectrometer (Agilent, 7890B).

## 2. Catalyst Preparation.

**Preparation of MIL-101:** MIL-101 was synthesized and purified according to the reported procedures.<sup>[S1]</sup> Typically,  $\text{Cr}(\text{NO}_3)_3 \cdot 9\text{H}_2\text{O}$  (4.33 g, 10 mmol), 1,4-benzene dicarboxylic acid (1.8 g, 10 mmol), de-ionized water (70 mL) and aqueous HF (0.5 mL, 2.5 mmol) were introduced into a Teflon-lined autoclave and heated at 220 °C for 8 h in an oven under static condition. After the reaction mixture was cooled down to room temperature, crystals were purified using the boiling water for 24 h to remove organic species trapped within the pores, after filtering with the glass filter, the resulting solid was purified twice in ethanol at reflux temperature for 24 h, then the crystalline MIL-101 product was further purified by solvothermal treatment in hot ethanol at 100 °C for 24 h. To obtain the pure crystals, the as-synthesized MIL-101 was further activated by the aqueous  $\text{NH}_4\text{F}$  solutions. The sample was finally dried at 150 °C for 12 h under in vacuum for further use.

**Preparation of  $\text{Pt}_m\text{Co}_n\text{@MIL-101}$ :** Encapsulation of  $\text{Pt}^{4+}$  and  $\text{Co}^{2+}$  precursors were carried on MIL-101 by double solvent method.<sup>[S2]</sup> Typically, 130 mg MIL-101 sample, which was pre-activated at 150 °C for 5 h, was added into 20 mL of dry n-hexane as hydrophobic solvent and sonicated for 30 min until the mixture dispersed uniformly. Then 90  $\mu\text{L}$  of  $\text{H}_2\text{PtCl}_6 \cdot 6\text{H}_2\text{O}$  and  $\text{CoCl}_2$  mixed precursors solution with various concentration as the hydrophilic solvent was dropwise added to the above suspension within 30 min under continuously vigorous stirred. After stirring for 5 h and removed n-hexane, the obtained  $\text{Pt}^{4+}\text{Co}^{2+}\text{@MIL-101}$  was suspended in 20 ml water and reduced by prepared 2 M aqueous  $\text{NaBH}_4$  solution for 5 h, then washed with acetone twice and dried in vacuum at 70 °C for further use. The corresponding Pt and Co content was determined by ICP. **Table S1**

**Preparation of  $\text{Pt}(\text{Co})\text{@MIL-101}$ :**  $\text{PtCo@MIL-101}$  was re-dispersed into 3.4 vol%  $\text{HNO}_3$  under stirring for 5 h.  $\text{Pt}(\text{Co})\text{@MIL-101}$  was obtained by washing with acetone,

then centrifugation and dried at 120 °C for 12 h under vacuum for further use. The corresponding Pt and Co content was determined by ICP. **Table S1**

**Table S1** Different atomic ratio of Pt:Co in PtCo@MIL-101 and the corresponding catalyst Pt(Co)@MIL-101 based on ICP-AES.

| Pt <sub>m</sub> Co <sub>n</sub> @MIL-101    | Pt(wt%) | Co(wt%) |
|---------------------------------------------|---------|---------|
| Pt@MIL-101                                  | 1.2     | -       |
| Co@MIL-101                                  | -       | 1.09    |
| Pt <sub>5</sub> Co <sub>4</sub> @MIL-101    | 1.04    | 0.239   |
| Pt <sub>5</sub> Co <sub>16</sub> @MIL-101   | 1.06    | 1.09    |
| Pt <sub>5</sub> Co <sub>64</sub> @MIL-101   | 1.13    | 4.01    |
| Pt <sub>5</sub> (Co) <sub>4</sub> @MIL-101  | 0.9     | 0.0183  |
| Pt <sub>5</sub> (Co) <sub>16</sub> @MIL-101 | 0.56    | 0.0153  |
| Pt <sub>5</sub> (Co) <sub>64</sub> @MIL-101 | 0.59    | 0.0147  |

### 3. Catalytic Performance.

**Catalytic performance evaluation for PtCo@MIL-101 in hydrogenation of nitroarenes reaction:** In a typical procedure, catalyst (containing 0.1 mmol PtCo) was dispersed in 5 mL ethanol, and then a certain amount of substrate(0.2 mmol) was added. The reactor was sealed, purged with hydrogen and pressurized to 0.1 MPa, followed by stirring with a magnetic stirrer at a rate of 300 rpm at 35 °C. After reaction, the mixture was separated by centrifugation. The reactants were analyzed by GC (Agilent 7890A), and all products were confirmed by GC-MS (Agilent 7890B).

**Table S2** Catalytic performance comparison between Pt(Co)@MIL-101 and previously reported Pt-M based catalysts toward the nitrobenzene hydrogenation.

| Catalyst                                    | Reaction condition         | TOF (h <sup>-1</sup> )<br>(Selectivity) | References in<br>paper |
|---------------------------------------------|----------------------------|-----------------------------------------|------------------------|
| Pt@MIL-101                                  | Ethanol,                   | 18053                                   | S3                     |
|                                             | 25°C, 4 MPa H <sub>2</sub> | (-)                                     |                        |
| Pt@MIL-101                                  | Ethanol,                   | 7074                                    | S4                     |
|                                             | 20°C, 1 MPa H <sub>2</sub> | (91.6%)                                 |                        |
| Pt <sub>8</sub> Co <sub>1</sub> @UiO-66     | Isopropyl alcohol          | 200                                     | S5                     |
|                                             | 25°C, 1 atm H <sub>2</sub> | (100%)                                  |                        |
| Pt@UiO-66                                   | Hexane,                    | 322                                     | S6                     |
|                                             | 25°C, 2 atm H <sub>2</sub> | (72.5%)                                 |                        |
| Pt <sub>5</sub> (Co) <sub>64</sub> @MIL-101 | Ethanol,                   | 496                                     | This work              |
|                                             | 35°C, 1 atm H <sub>2</sub> | (100%)                                  |                        |

**Table S3** Catalytic recyclability of Pt<sub>5</sub>(Co)<sub>64</sub>@MIL-101 for nitrobenzene hydrogenation.

| Run | Yield(%) | Selectivity |
|-----|----------|-------------|
| 1   | 100      | 100         |
| 2   | 93.5     | 93.5        |
| 3   | 89.6     | 89.6        |
| 4   | 91       | 91          |

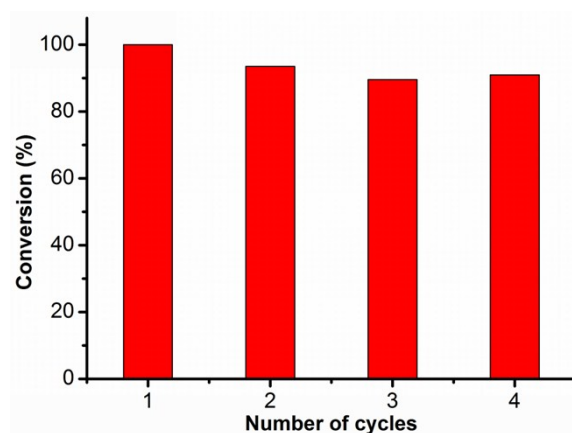

Reaction conditions: 0.2 mmol nitrobenzene, 5 mg  $\text{Pt}_5(\text{Co})_{64}@\text{MIL-101}$ , 5 mL EtOH, 35°C; the yield was evaluated at 1h for each run.

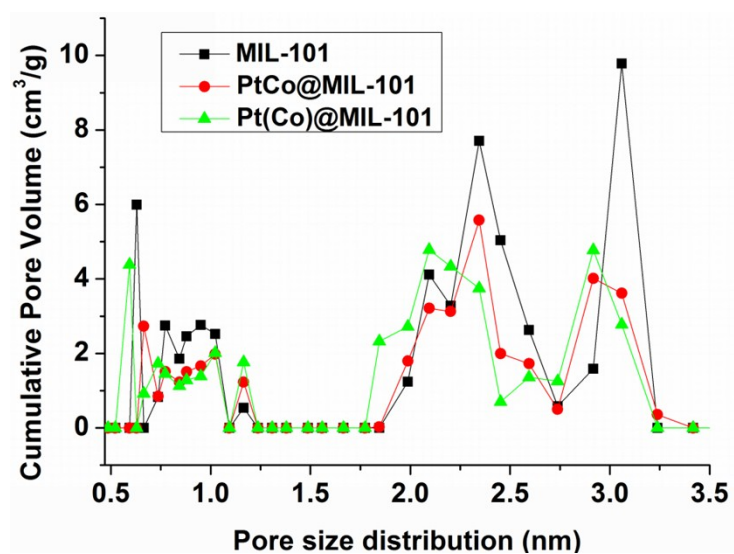

**Fig. S1** Pore size distribution of MIL-101, PtCo@MIL-101 and Pt(Co)@MIL-101.

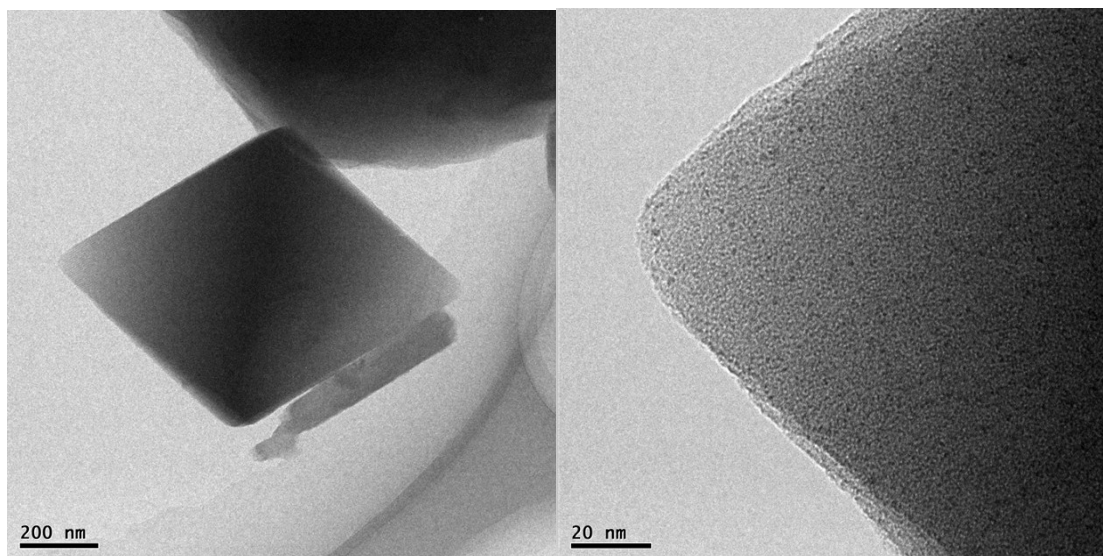

**Fig. S2** TEM image of Pt<sub>5</sub>Co<sub>16</sub>@MIL-101.

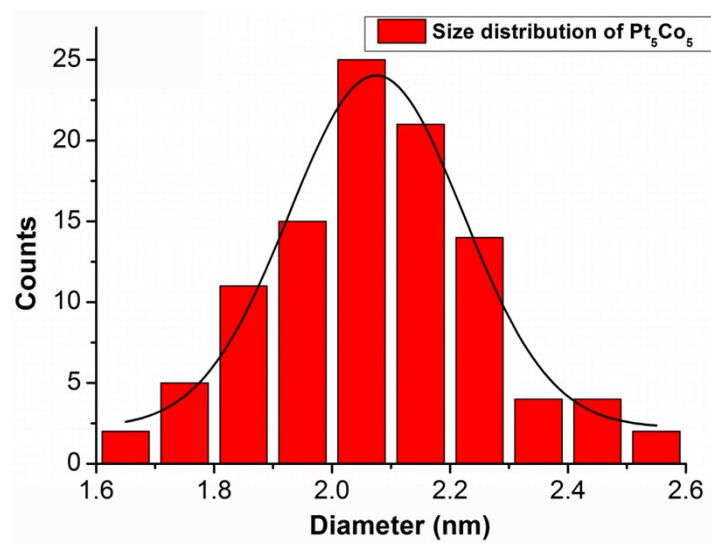

**Fig. S3** Pt<sub>5</sub>Co<sub>16</sub> NPs size distribution of Pt<sub>5</sub>Co<sub>16</sub>@MIL-101.

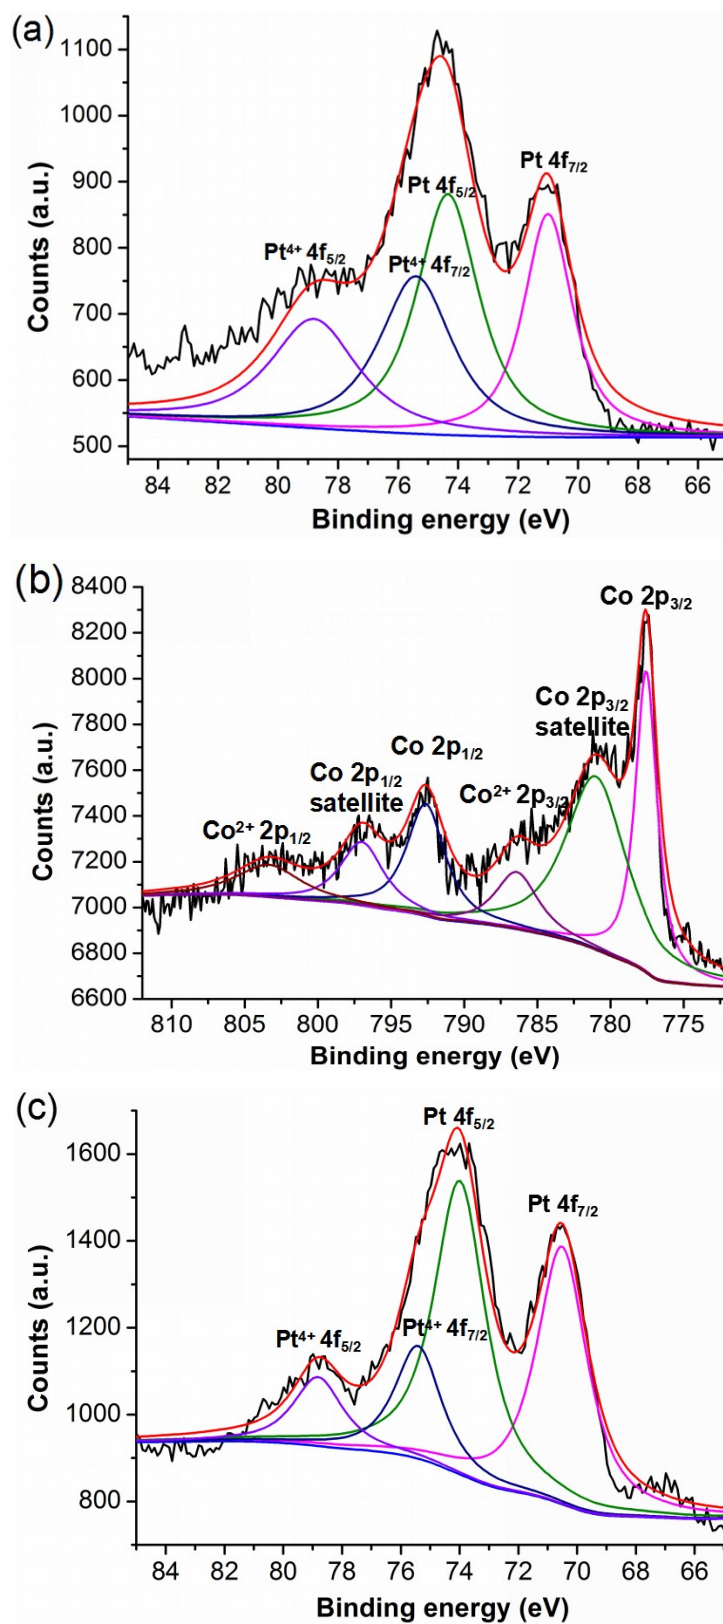

**Fig. S4** (a) Pt 4f XPS spectra of  $\text{Pt}_5\text{Co}_{16}@\text{MIL-101}$ ; (b) Co 2p XPS spectra of  $\text{Pt}_5\text{Co}_{16}@\text{MIL-101}$ ; (c) Pt 4f XPS spectra of  $\text{Pt}_5(\text{Co})_{16}@\text{MIL-101}$ .

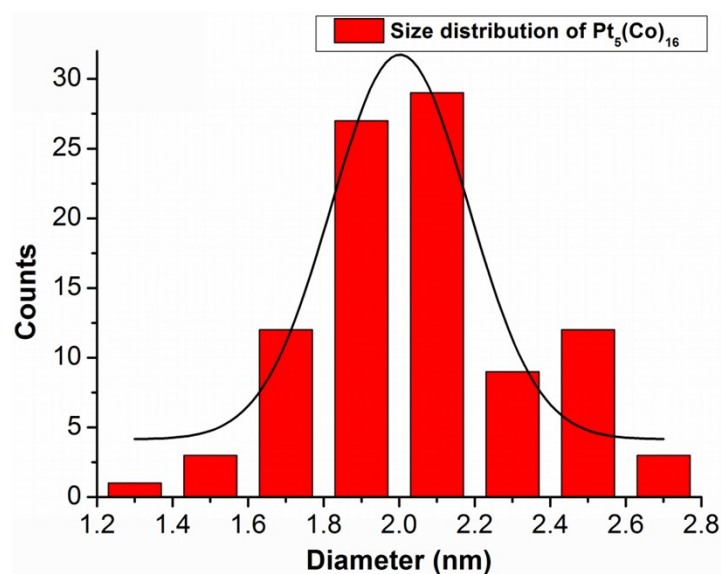

**Fig. S5**  $\text{Pt}_5(\text{Co})_{16}$  NPs size distribution of  $\text{Pt}_5(\text{Co})_{16}@\text{MIL-101}$ .

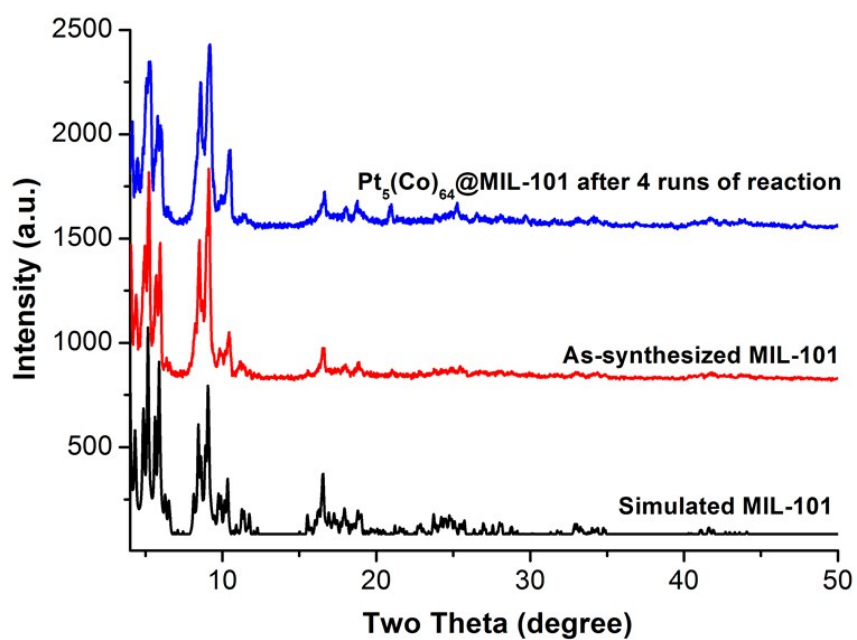

**Fig. S6** Powder XRD patterns of simulated MIL-101, as-synthesized MIL-101 and  $\text{Pt}_5(\text{Co})_{16}@\text{MIL-101}$  after 4 cycles of hydrogenation of nitrobenzene.



## References

- S1. G. Férey, C. Mellot-Draznieks, C. Serre, F. Millange, J. Dutour, S. Surblé and I. Margiolaki, *Science*, 2005, **309**, 2040-2042.
- S2. Q. L. Zhu, J. Li, Q. Xu, *J. Am. Chem. Soc.*, 2013, **135**, 10210-10213.
- S3. H. Y. Pan, X. H. Li, Y. Yu, J. R. Li, J. Hu, Y. J. Guan, P. Wu, *J. Mol. Catal. A*, 2015, **399**, 1-9.
- S4. W. C. Du, G. Z. Chen, R. F. Nie, Y. W. Li, Z. Y. Hou, *Catal. Comm.*, 2013, **41**, 56-59.
- S5. L. N. Chang, Y. W. Li, *Molecular Catalysis*, 2017, **433**, 77-83.
- S6. C. Rçsler, S. Dissegna, V. L. Rechac, M. Kauer, P. H. Guo, S. Turner, L. Xamena, and R. A. Fischer, *Chem. Eur. J.*, 2017, **23**, 3583-3594.
